# Supplementary material for: Coronary Artery Disease in Patients Hospitalized for Peripheral Artery Disease: A Nationwide Analysis of 1.8 Million Patients
Source: MDPI journal article supplement (doi:10.3390/diagnostics13061163), 2023-03-18
Supplement: s1 [file s1]

**Table S1:** Co-prevalence of peripheral artery disease (PAD) and coronary artery disease (CAD). Font. = Fontaine stage; Fontaine IVu = Fontaine IV with ulcers; Fontaine IVg = Fontaine IV with gangrene; CAD 0-3 = number of vessels with significant stenoses. Data are percentages.

| PAD       | CAD   | 2009 | 2010 | 2011 | 2012 | 2013 | 2014 | 2015 | 2016 | 2017 | 2018 | Mean | Change 2009-2018 |
|-----------|-------|------|------|------|------|------|------|------|------|------|------|------|------------------|
| Font. IIb | CAD 0 | 1.5  | 1.4  | 1.4  | 1.5  | 1.6  | 1.3  | 1.4  | 1.4  | 1.3  | 1.2  | 1.4  | -16.9            |
|           | CAD 1 | 2.8  | 2.7  | 2.9  | 3.1  | 3.1  | 3.3  | 3.6  | 3.5  | 3.8  | 3.8  | 3.3  | +37.0            |
|           | CAD 2 | 3.6  | 3.8  | 3.7  | 3.8  | 3.8  | 3.8  | 4.3  | 4.4  | 4.5  | 4.4  | 4.0  | +22.3            |
|           | CAD 3 | 6.8  | 7.0  | 7.0  | 7.3  | 7.9  | 8.0  | 8.6  | 9.2  | 9.2  | 9.1  | 8.0  | +33.1            |
| Font. III | CAD 0 | 1.5  | 1.5  | 1.4  | 1.6  | 1.5  | 1.4  | 1.3  | 1.5  | 1.3  | 1.5  | 1.4  | -2.3             |
|           | CAD 1 | 2.7  | 2.7  | 3.2  | 3.4  | 3.2  | 3.5  | 3.9  | 4.0  | 3.8  | 4.0  | 3.4  | +51.5            |
|           | CAD 2 | 3.8  | 4.1  | 3.9  | 4.0  | 4.2  | 4.5  | 4.6  | 4.9  | 5.0  | 4.8  | 4.4  | +27.2            |
|           | CAD 3 | 7.9  | 8.1  | 8.5  | 8.8  | 9.2  | 9.6  | 9.5  | 10.8 | 10.8 | 10.8 | 9.4  | +36.8            |
| Font. IVu | CAD 0 | 1.6  | 1.5  | 1.4  | 1.4  | 1.3  | 1.3  | 1.2  | 1.4  | 1.2  | 1.1  | 1.3  | -28.7            |
|           | CAD 1 | 2.1  | 2.1  | 2.3  | 2.6  | 2.9  | 3.1  | 3.3  | 3.7  | 3.8  | 4.0  | 3.1  | +90.5            |
|           | CAD 2 | 3.1  | 3.4  | 3.3  | 3.4  | 3.7  | 3.9  | 4.1  | 4.5  | 4.4  | 4.9  | 3.9  | +57.4            |
|           | CAD 3 | 7.1  | 7.8  | 7.9  | 8.3  | 8.9  | 9.7  | 10.4 | 11.1 | 11.0 | 11.5 | 9.6  | +62.8            |
| Font. IVg | CAD 0 | 1.5  | 1.4  | 1.3  | 1.3  | 1.3  | 1.1  | 1.1  | 1.2  | 1.2  | 1.0  | 1.2  | -33.3            |
|           | CAD 1 | 2.2  | 2.1  | 2.4  | 2.7  | 2.9  | 3.0  | 3.5  | 3.7  | 3.9  | 3.9  | 3.0  | +78.5            |
|           | CAD 2 | 3.1  | 3.4  | 3.4  | 3.8  | 4.0  | 4.0  | 4.4  | 4.7  | 4.9  | 4.8  | 4.0  | +55.8            |
|           | CAD 3 | 7.5  | 8.0  | 8.8  | 9.5  | 10.2 | 11.4 | 11.5 | 12.3 | 12.5 | 12.9 | 10.5 | +70.9            |
| Total     | CAD 0 | 1.5  | 1.4  | 1.3  | 1.4  | 1.5  | 1.3  | 1.3  | 1.4  | 1.3  | 1.2  | 1.4  | -20.8            |
|           | CAD 1 | 2.5  | 2.5  | 2.7  | 2.9  | 3.0  | 3.2  | 3.6  | 3.7  | 3.8  | 3.9  | 3.2  | +54.3            |
|           | CAD 2 | 3.4  | 3.7  | 3.6  | 3.8  | 3.9  | 4.0  | 4.3  | 4.5  | 4.6  | 4.6  | 4.1  | +35.0            |
|           | CAD 3 | 7.2  | 7.5  | 7.8  | 8.2  | 8.8  | 9.2  | 9.7  | 10.4 | 10.4 | 10.6 | 9.0  | +47.3            |
